# Supplementary material for: Formation of complex organics by covalent and non-covalent interactions of the sequential reactions of 1–4 acrylonitrile molecules with the benzonitrile radical cation
Source: Royal Society of Chemistry journal article supplement (doi:10.1039/d4cp03594a), 2024-01-01
Supplement: d4cp03594a1.pdf [file d4cp03594a1.pdf]

## Electronic Supplementary Information (ESI)

### **Formation of Complex Organics by Covalent and Non-Covalent Interactions of the Sequential Reactions of 1-4 Acrylonitrile Molecules with the Benzonitrile Radical Cation**

Paige Sutton, John Saunier, Kyle A. Mason, Adam C. Pearcy, Ka Un Lao,  
and M. Samy El-Shall\*

Department of Chemistry, Virginia Commonwealth University,  
Richmond, VA 23284-2006

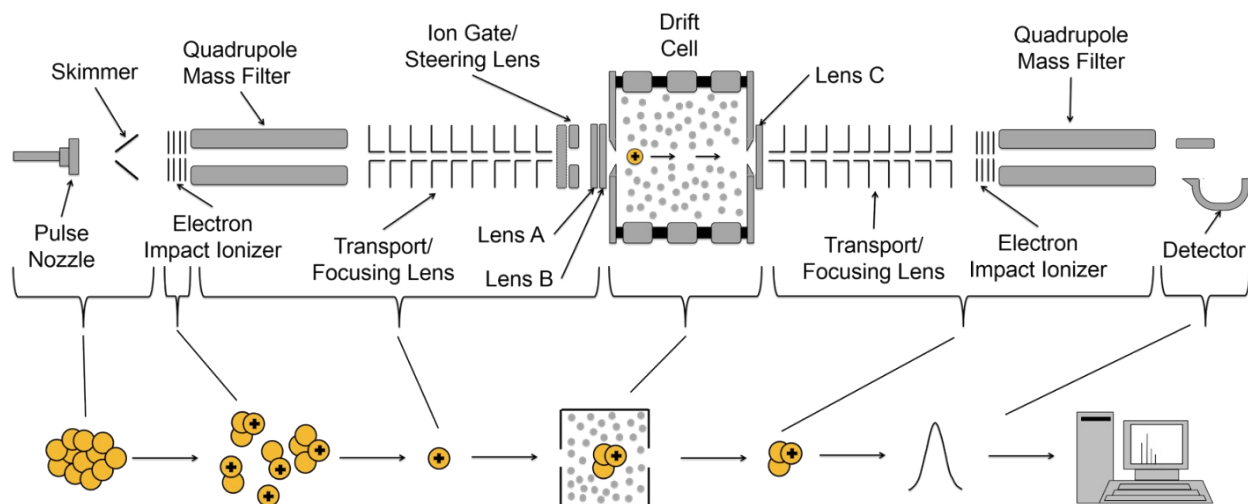

**Fig. S1.** Experimental set-up of the Mass-Selected Ion Mobility System

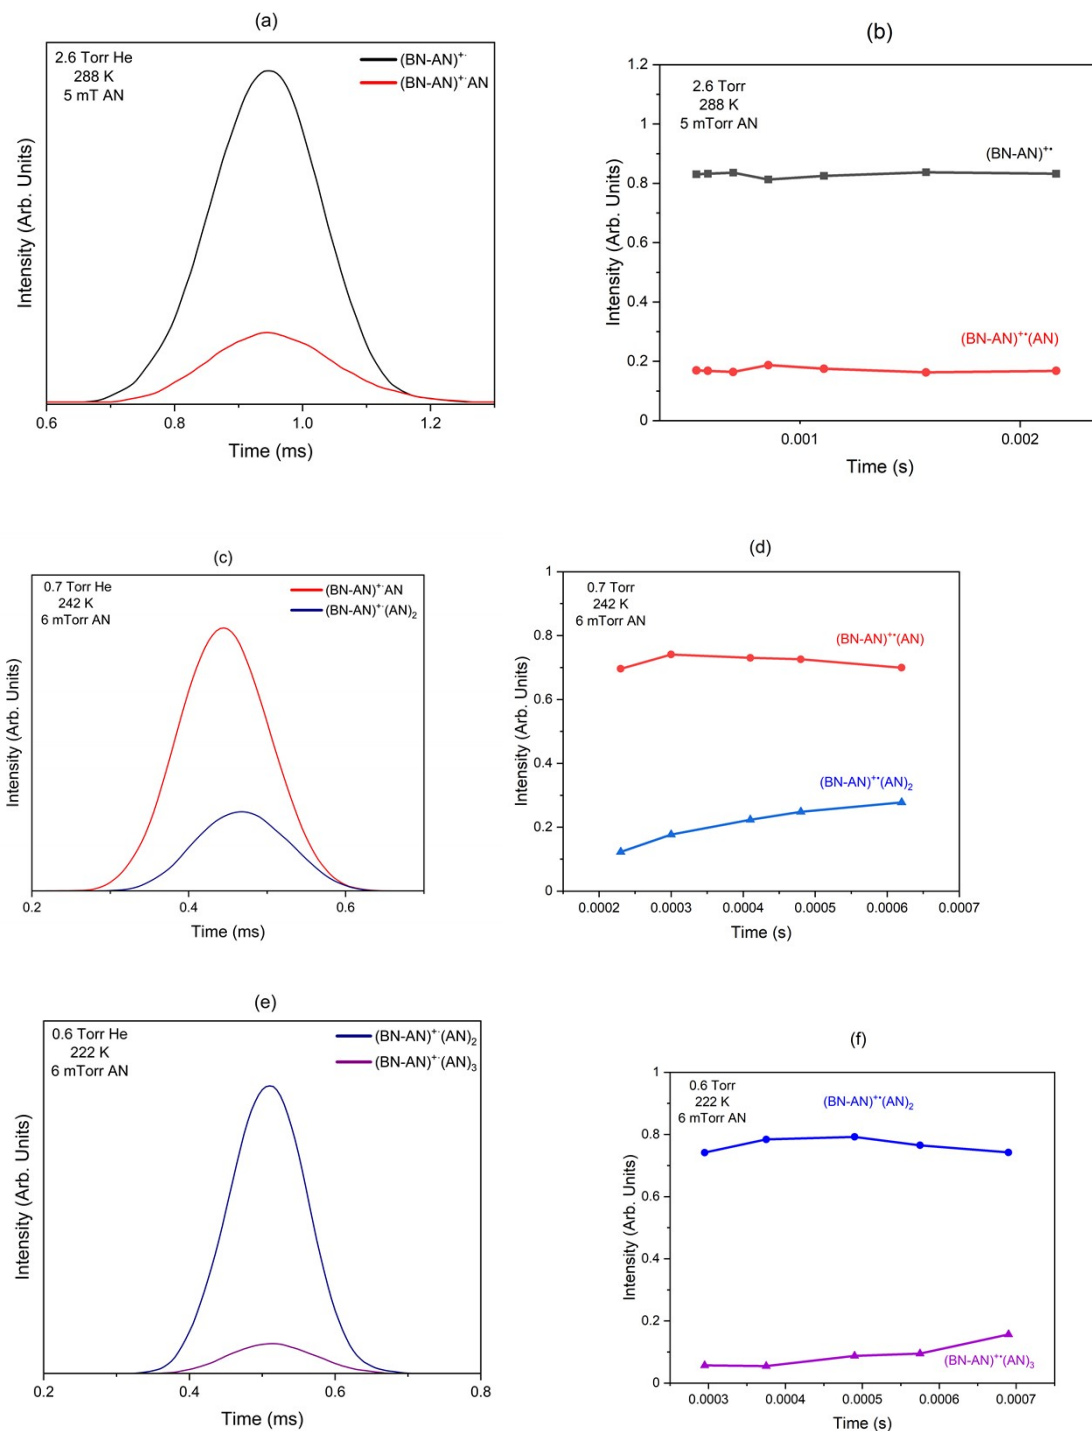

**Fig. S2.** Paired ATDs and time profiles for the formation of **(a-b)**  $(\text{BN-AN})^+\text{AN}$ , **(c-d)**  $(\text{BN-AN})^+(\text{AN})_2$ , **(e-f)**  $(\text{BN-AN})^+(\text{AN})_3$  at the indicated temperatures and pressures as a result of the acrylonitrile association with the benzonitrile-acrylonitrile adduct.
